# Supplementary material for: Experimental infection and transmission of Leishmania by Lutzomyia cruzi (Diptera: Psychodidae): Aspects of the ecology of parasite-vector interactions
Source: PubMed Central journal article supplement (PMC5342273; doi:10.1371/journal.pntd.0005401), 2017-02-24

**Supplementary Fig. S1. Nylon cage used for xenodiagnosis with dogs.**

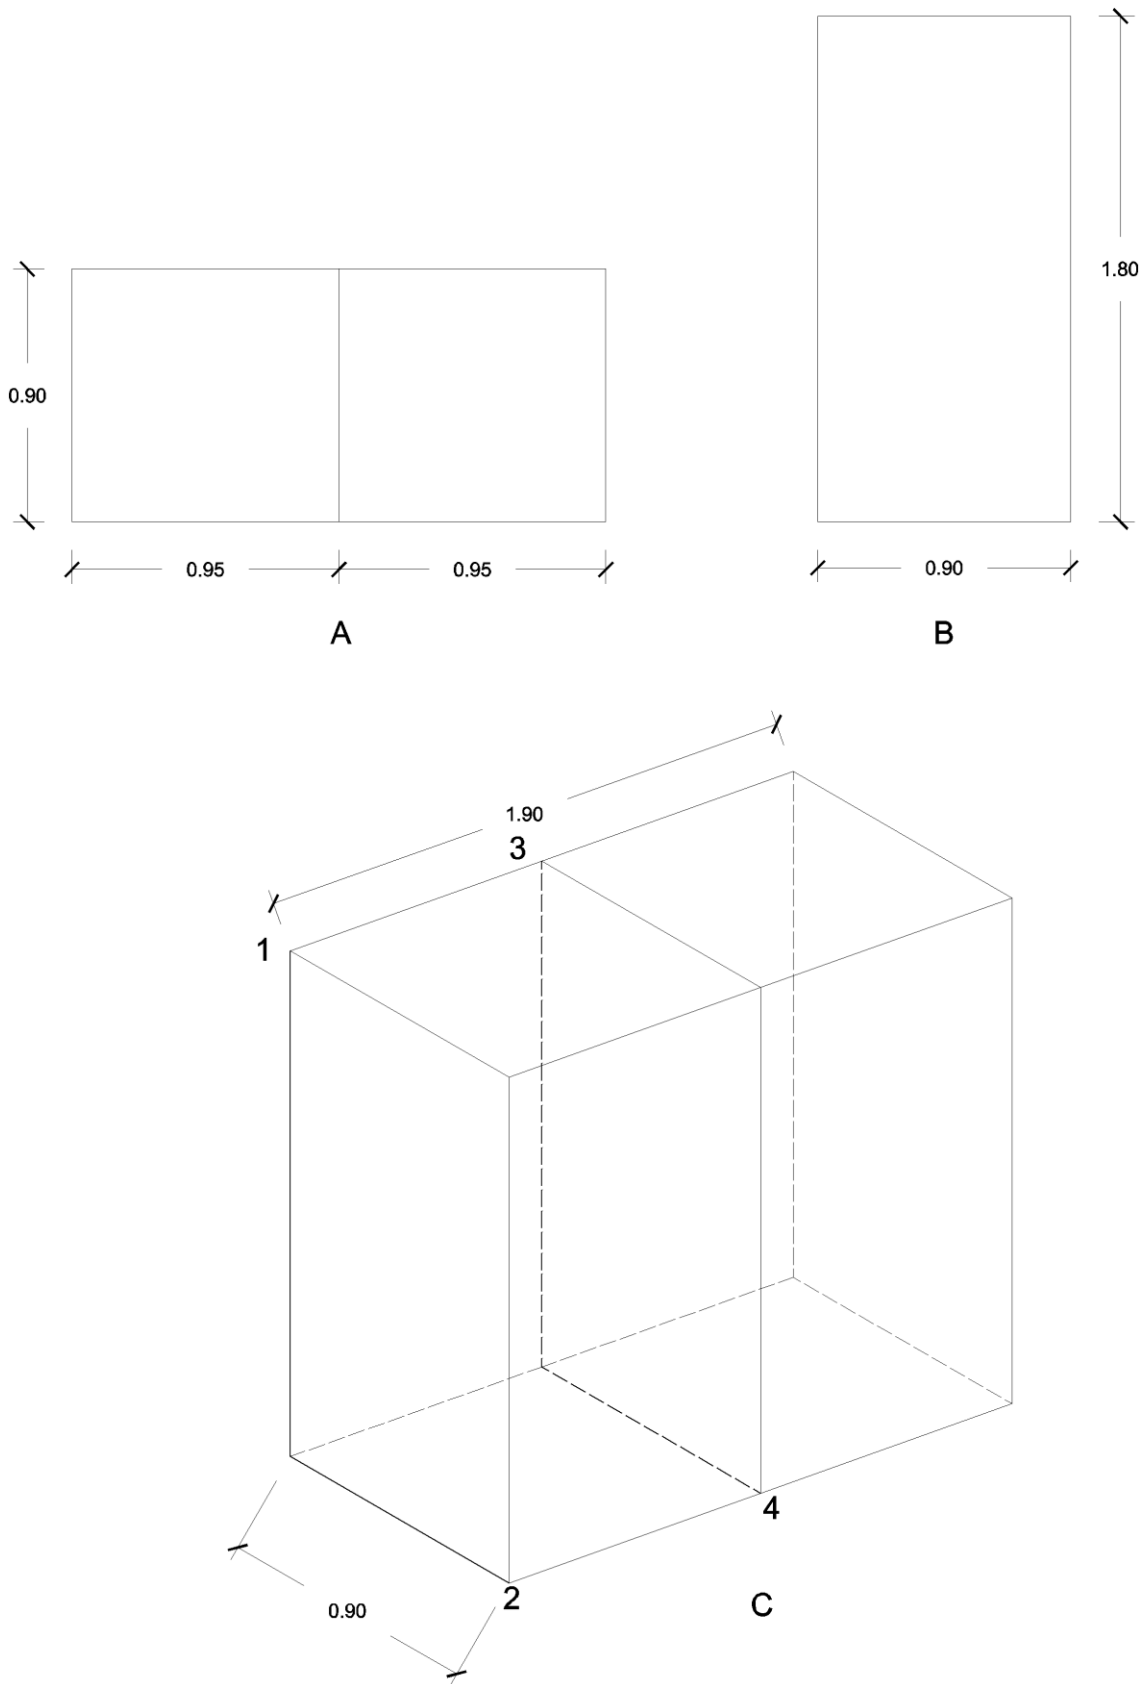

(A) Schematic; (B) Side view; (C) 3-dimensional view – points 1-2 and 3-4 linked by meter-long double-sided zipper to allow opening and closing from inside and outside.

**Real Images:**

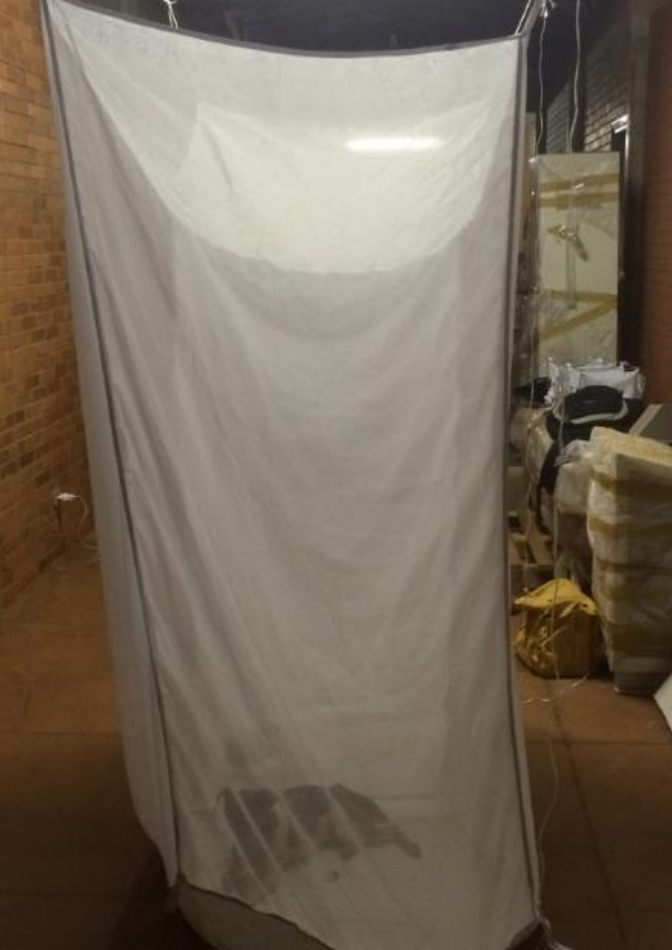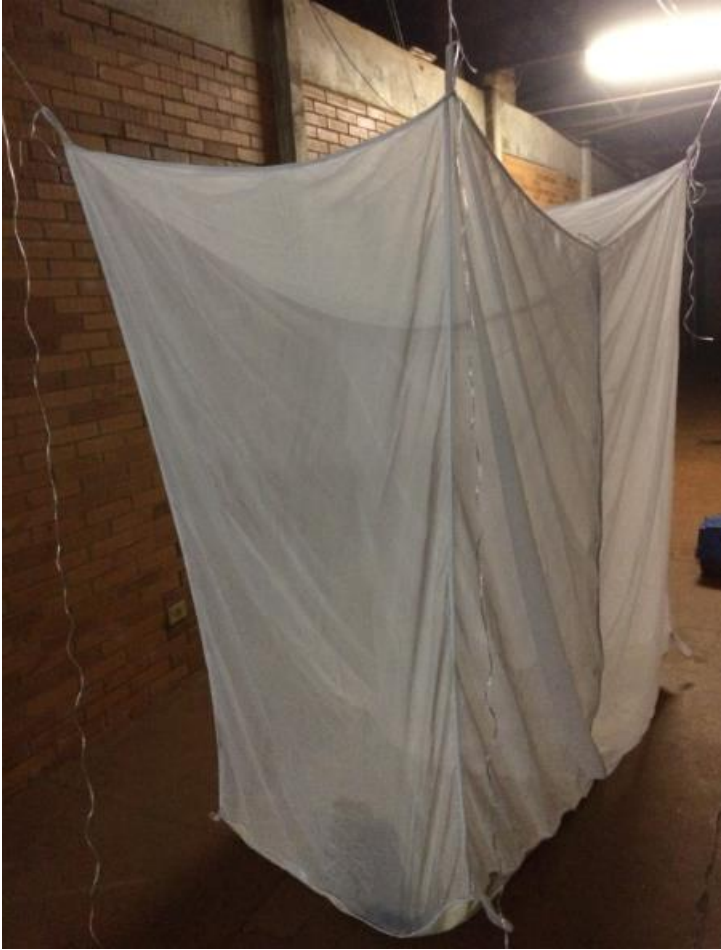

Supplement: pntd.0005401.s001.pdf [file pntd.0005401.s001.pdf]
