# Supplementary material for: Experimental infection and transmission of Leishmania by Lutzomyia cruzi (Diptera: Psychodidae): Aspects of the ecology of parasite-vector interactions
Source: PubMed Central journal article supplement (PMC5342273; doi:10.1371/journal.pntd.0005401), 2017-02-24

**Supplementary Fig. S2. Tent used for experiments on human and canine attractiveness to sand flies.**

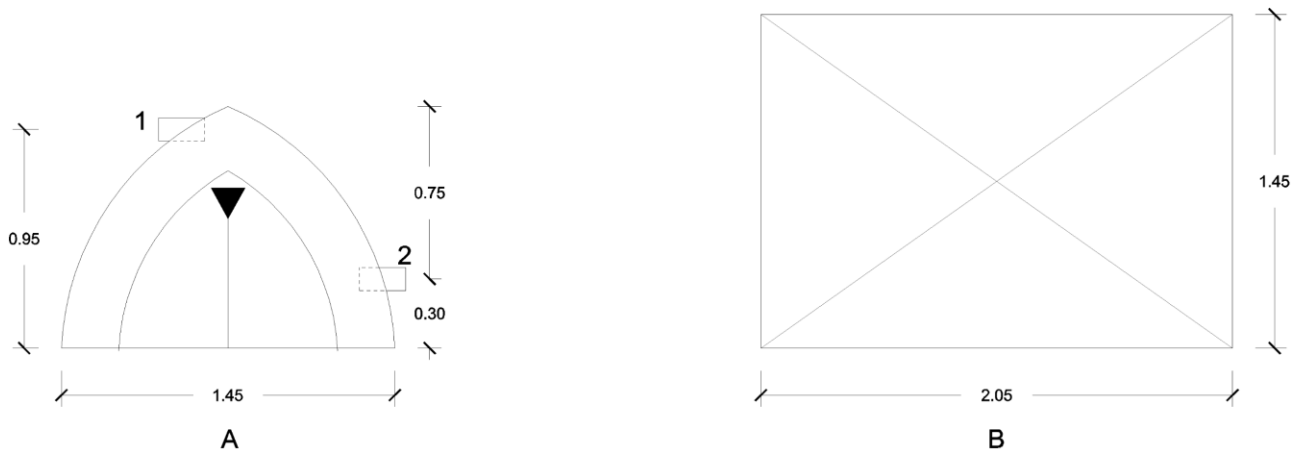

(A) Front view – 1) device for the exiting of air (screened 1-m PVC tube); 2) device for the entry of air (screened 1-m PVC tube) with cooler (not shown in figure) to adjust velocity; (B) Schematic of tent.

Real Images:

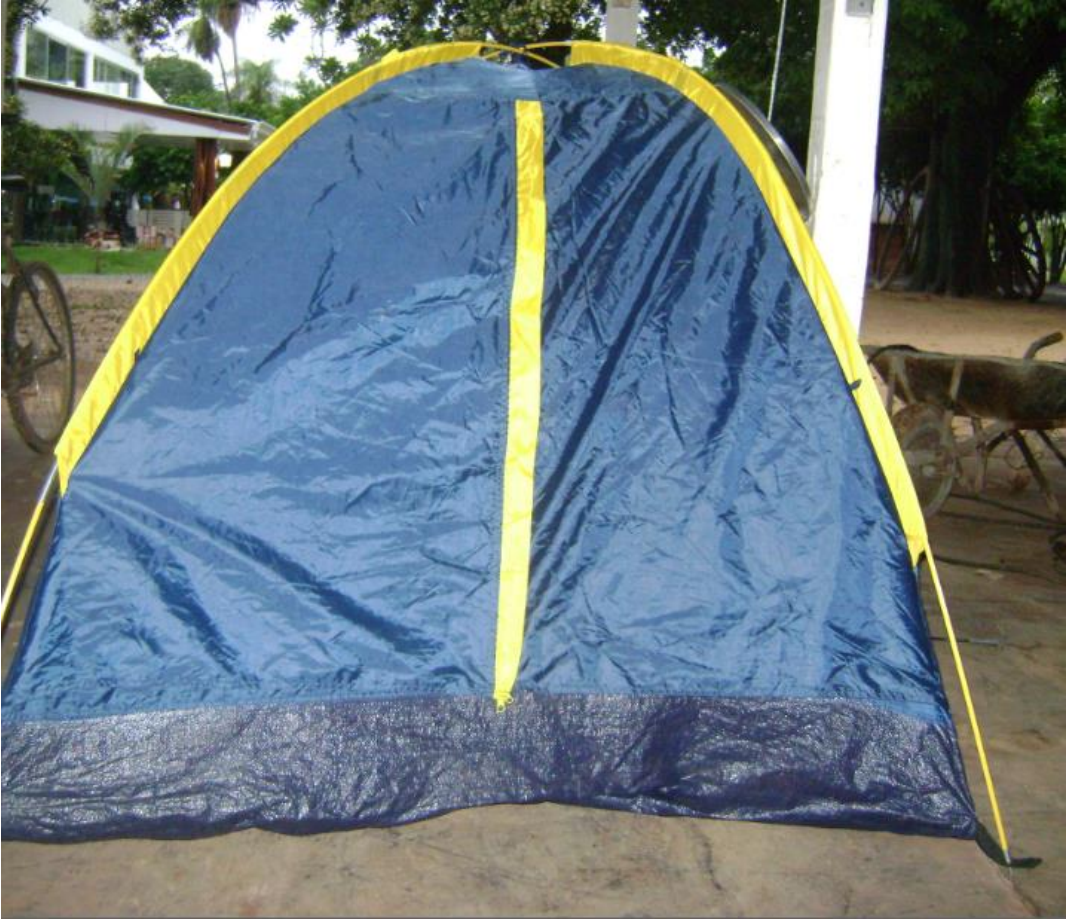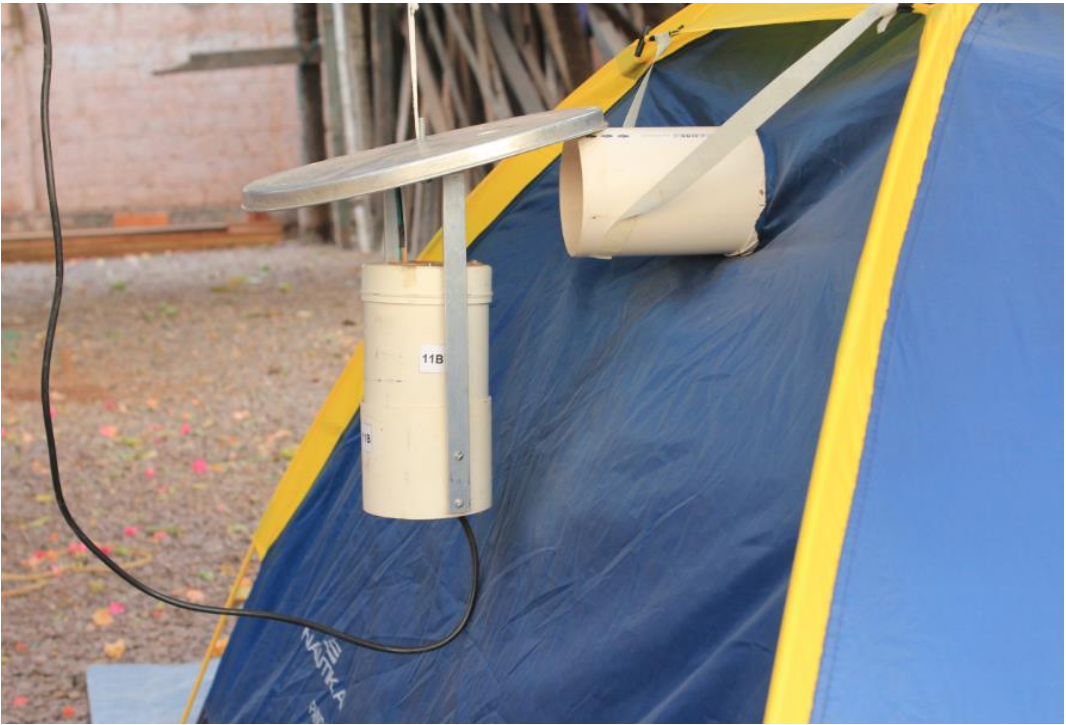

Supplement: pntd.0005401.s002.pdf [file pntd.0005401.s002.pdf]
