# Supplementary material for: Experimental infection and transmission of Leishmania by Lutzomyia cruzi (Diptera: Psychodidae): Aspects of the ecology of parasite-vector interactions
Source: PubMed Central journal article supplement (PMC5342273; doi:10.1371/journal.pntd.0005401), 2017-02-24

Supplementary Fig. S3. Imprint of the spleen of the hamster showing amastigotes of *L. amazonensis*.

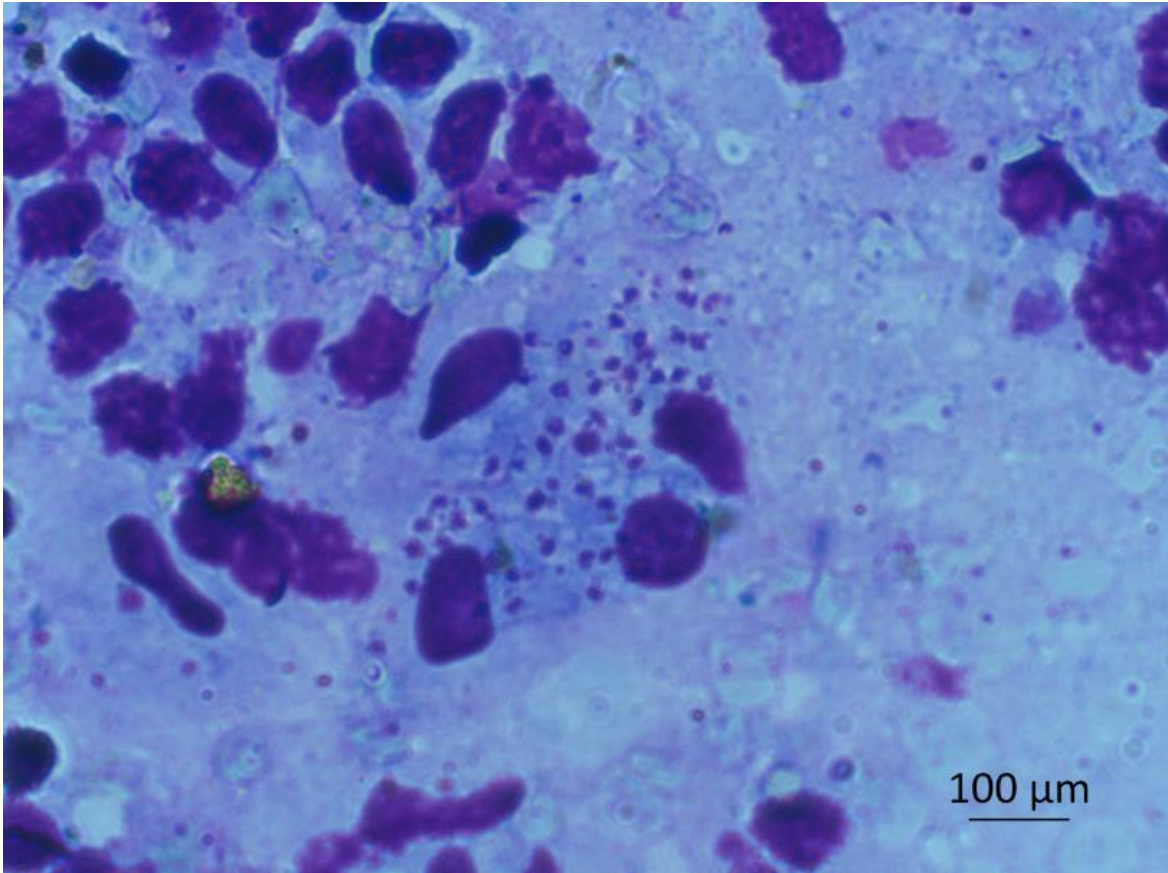

Supplement: pntd.0005401.s003.pdf [file pntd.0005401.s003.pdf]
