# Supplementary material for: Experimental infection and transmission of Leishmania by Lutzomyia cruzi (Diptera: Psychodidae): Aspects of the ecology of parasite-vector interactions
Source: PubMed Central journal article supplement (PMC5342273; doi:10.1371/journal.pntd.0005401), 2017-02-24
Supplement: pntd.0005401.s004.pdf [file pntd.0005401.s004.pdf]

Supplementary Table S1. Temperature, relative humidity and feeding rate during xenodiagnosis according the infected hosts.

| <b>Infected host</b> | <b>Date (AAAA/MM/DD)</b> | <b>Temperature (°C)</b> | <b>Relative humidity (%)</b> | <b>Feeding rate (%)</b> |
|----------------------|--------------------------|-------------------------|------------------------------|-------------------------|
| Dog                  |                          |                         |                              |                         |
|                      | 2013/09/06               | 33.0                    | 29.0                         | 75.0                    |
|                      | 2013/10/15               | 24.0                    | 100.0                        | 63.6                    |
|                      | 2013/11/22               | 30.0                    | 51.0                         | 80.0                    |
|                      | 2013/11/29               | 34.5                    | 38.0                         | 100.0                   |
|                      | 2014/04/07               | 33.0                    | 50.0                         | 53.1                    |
|                      | 2014/05/08               | 28.0                    | 56.0                         | 32.8                    |
| Hamster              |                          |                         |                              |                         |
|                      | 2014/04/10               | 30.5                    | 71.0                         | 38.9                    |
|                      | 2014/06/04               | 28.0                    | 67.0                         | 39.0                    |
|                      | 2014/06/27               | 28.5                    | 52.0                         | 42.9                    |

Note: all the experiments (replicates) were performed between 18:00 and 19:00.
